# Supplementary material for: PEG-based hydrogels prepared by catalyst-free thiol–yne addition and their post-antibacterial modification
Source: Royal Society of Chemistry journal article supplement (doi:10.1039/c6bm00395h), 2016-01-01
Supplement: c6bm00395h1.pdf [file c6bm00395h1.pdf]

*Electronic Supplementary Information*

**PEG-based Hydrogels Prepared by Catalyst-free Thiol-yne Addition and  
Their Post-antibacterial Modification**

Xiao Yan Cai<sup>1</sup>, Jun Zhi Li<sup>1</sup>, Ning Ning Li<sup>1</sup>, Jiu Cun Chen<sup>1</sup>, En-Tang Kang<sup>2</sup>,  
Li Qun Xu<sup>1\*</sup>

<sup>1</sup> Institute for Clean Energy and Advanced Materials  
Faculty of Materials and Energy  
Southwest University  
Chongqing, P.R. China 400715

<sup>2</sup> Department of Chemical and Biomolecular Engineering  
National University of Singapore  
Kent Ridge, Singapore 117576

\* To whom correspondence should be addressed:  
E-mail: xulq@swu.edu.cn

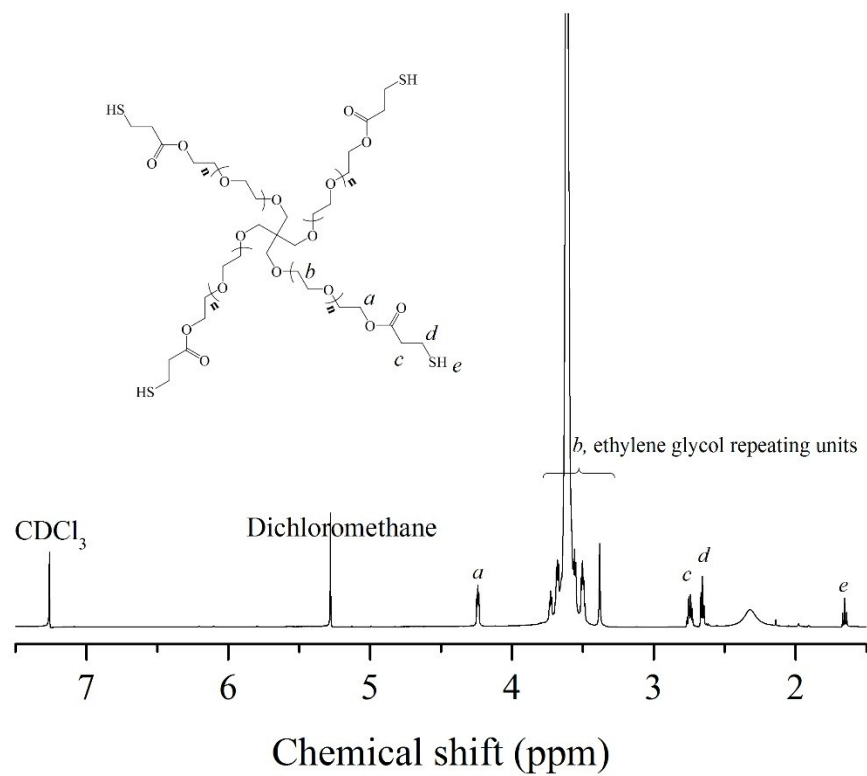

**Figure S1.**  $^1\text{H}$  NMR spectrum of PEG<sub>10k</sub>-4-SH in  $\text{CDCl}_3$ .

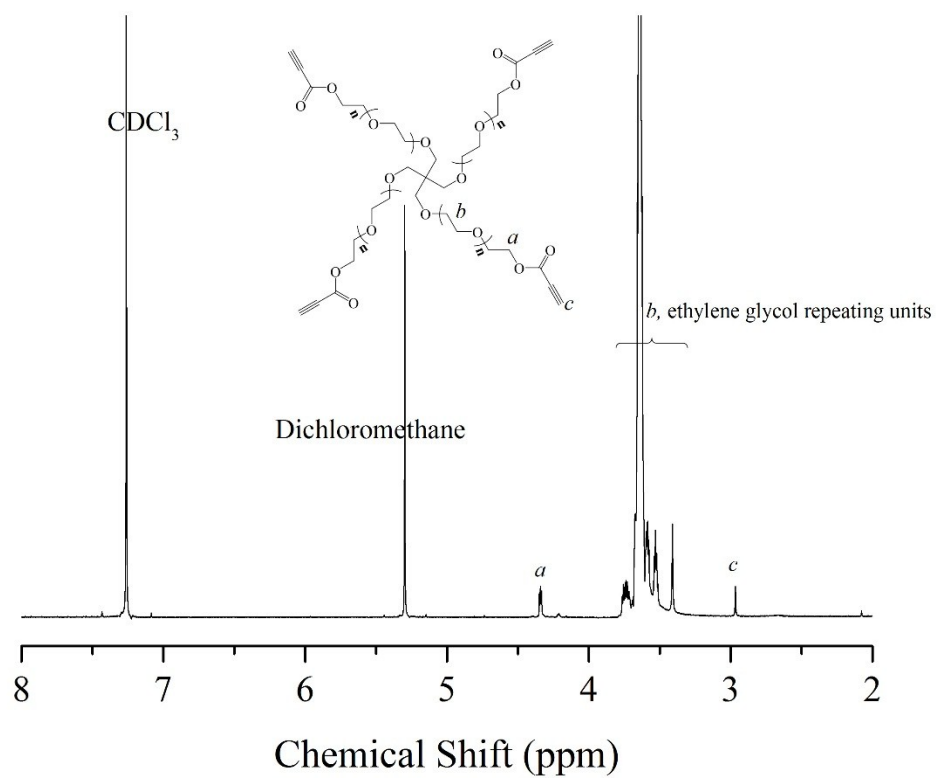

**Figure S2.**  $^1\text{H}$  NMR spectrum of  $\text{PEG}_{10\text{k}}\text{-4-PP}$  in  $\text{CDCl}_3$ .

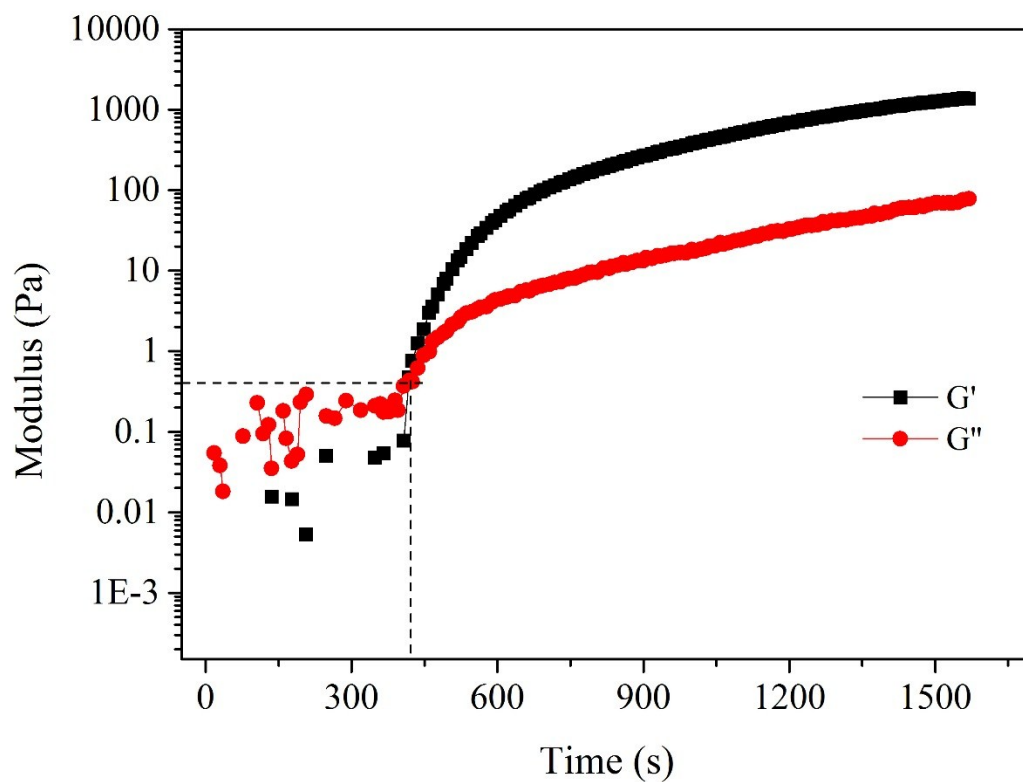

**Figure S3.** Time-dependent storage modulus ( $G'$ ) and loss modulus ( $G''$ ) evolution of gel precursors at PEG concentration of 10 wt% with equivalent PEG<sub>10k</sub>-4-SH to PEG<sub>10k</sub>-4-PP weight ratio.

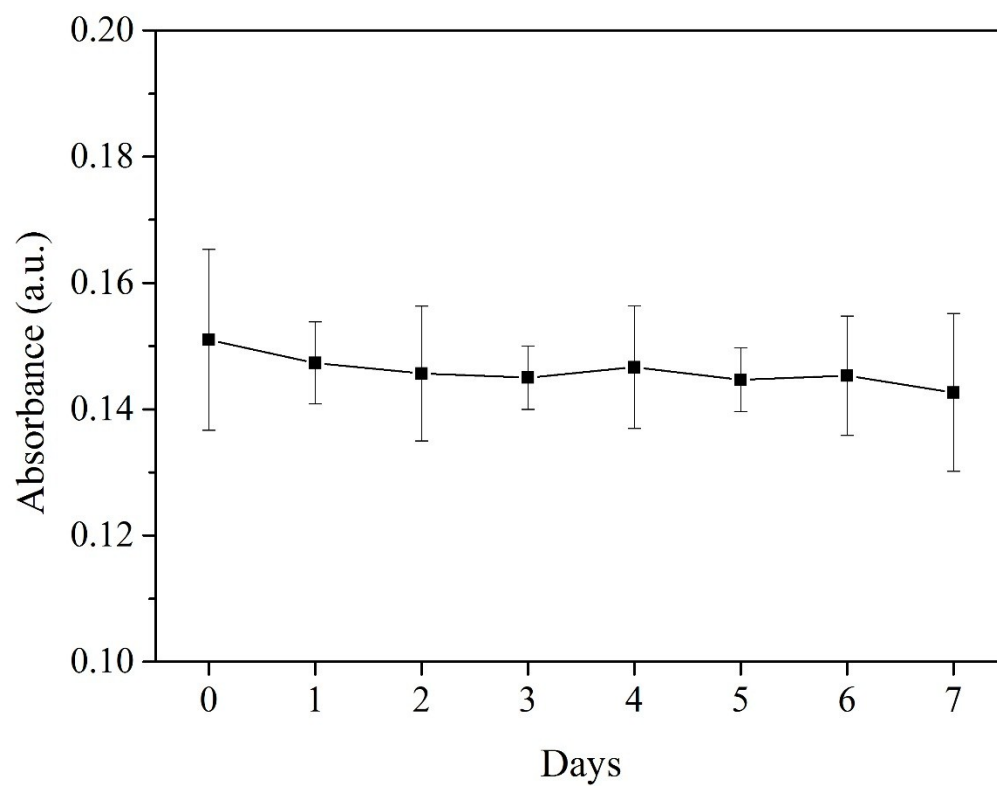

**Figure S4.** Absorption maximum (at 555 nm) of the fluorescence dye-functionalized hydrogels in the wells of 96-well plate, upon immersion in PBS solution for several days.

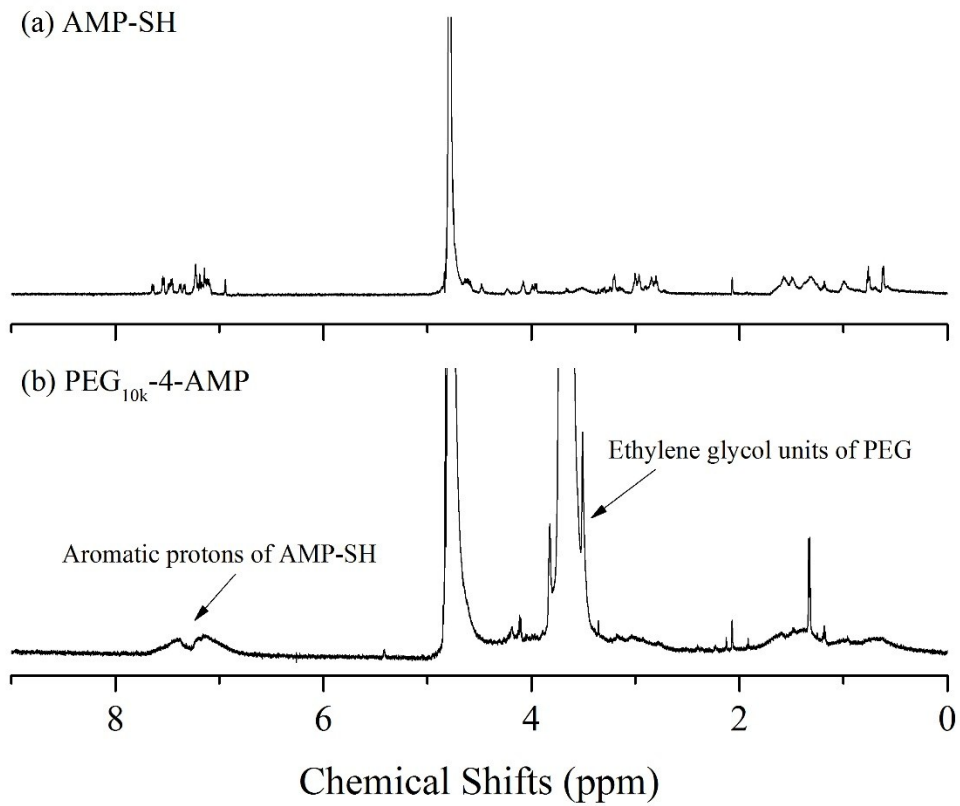

**Figure S5.** <sup>1</sup>H NMR spectra of AMP-SH and PEG<sub>10k</sub>-4-AMP in D<sub>2</sub>O.
